# Supplementary material for: Functional analysis of the EsaB component of the Staphylococcus aureus Type VII secretion system
Source: PubMed Central journal article supplement (PMC5845737; doi:10.1099/mic.0.000580), 2017-11-22
Supplement: mic-163-1851-s001.pdf [file mic-163-1851-s001.pdf]

**Functional analysis of the EsaB component of the  
*Staphylococcus aureus* Type VII secretion system**

**SUPPLEMENTARY INFORMATION**

M. Guillermina Casabona<sup>1</sup>, Grant Buchanan<sup>1</sup>, Martin Zoltner<sup>1</sup>, Catriona P. Harkins<sup>2</sup>, Matthew T.G. Holden<sup>2</sup> and Tracy Palmer<sup>1\*</sup>

<sup>1</sup>Division of Molecular Microbiology School of Life Sciences, University of Dundee, Dundee, UK.

<sup>2</sup>School of Medicine, University of St Andrews, St Andrews, KY16 9TF, UK.

\*To whom correspondence should be addressed.

Tel +44 1382 386464

e-mail [t.palmer@dundee.ac.uk](mailto:t.palmer@dundee.ac.uk)

| Primer    | Nucleotide Sequence (5'-3')              | Usage                                                                                      |
|-----------|------------------------------------------|--------------------------------------------------------------------------------------------|
| EsaB-pET1 | GCGCGCCATATGAATCAGCACGTAAAAGT AAC        | Amplification of <i>esaB</i> synthetic gene for cloning into pET15b                        |
| EsaB-pET2 | GCGCGCCTCGAGTCACAGCAGTTTCAGAA TATCGCCATC | Amplification of <i>esaB</i> synthetic gene for cloning into pET15b                        |
| EsaB-fw   | TTTTGTTAACTCATAAAGGGAGACGAACG            | Amplification of <i>esaB</i> gene and its own RBS from RN6390 genome for cloning in pRAB11 |
| EsaB-rev  | TTAGAATTCCCTCCTATAGTAACTTCAAATA TC       | Amplification of <i>esaB</i> gene and its own RBS from RN6390 genome for cloning in pRAB11 |
| MGC3      | CACGTA AAAAGTAGCATTGATTTACT              | Quick change mutagenesis EsaB T8A                                                          |
| MGC4      | AGTAA AATCAAATGCTACTTTTACGTG             | Quick change mutagenesis EsaB T8A                                                          |
| MGC153    | CACGTA AAAAGTAAAATTTGATTTACT             | Quick change mutagenesis EsaB T8K                                                          |
| MGC154    | AGTAA AATCAAATTTTACTTTTACGTG             | Quick change mutagenesis EsaB T8K                                                          |
| MGC161    | CACGTA AAAAGTAAGATTTGATTTACT             | Quick change mutagenesis EsaB T8R                                                          |
| MGC162    | AGTAA AATCAAATCTTACTTTTACGTG             | Quick change mutagenesis EsaB T8R                                                          |
| MGC163    | CACGTA AAAAGTACATTTGATTTACT              | Quick change mutagenesis EsaB T8H                                                          |
| MGC164    | AGTAA AATCAAATGTACTTTTACGTG              | Quick change mutagenesis EsaB T8H                                                          |
| MGC53     | CACGTA AAAAGTAGAATTTGATTTACT             | Quick change mutagenesis EsaB T8E                                                          |
| MGC54     | AGTAA AATCAAATCTTACTTTTACGTG             | Quick change mutagenesis EsaB T8E                                                          |
| MGC174    | CAGCACGTAAAAGTATCATTGATTTACT             | Quick change mutagenesis EsaB T8S                                                          |
| MGC175    | AGTAA AATCAAATGATACTTTTACGTGCTG          | Quick change mutagenesis EsaB T8S                                                          |
| MGC5      | AAAGTAACATTTGCATTTACTAATTAT              | Quick change mutagenesis EsaB D10A                                                         |
| MGC6      | ATAATTAGTAAATGCAAATGTTACTTT              | Quick change mutagenesis EsaB D10A                                                         |
| MGC7      | TACGGCACATATGCATTAGCAGTACCA              | Quick change mutagenesis EsaB D20A                                                         |
| MGC8      | TGGTACTGCTAATGCATATGTGCCGTA              | Quick change mutagenesis EsaB D20A                                                         |
| MGC133    | GGCACATATGACGCAGCAGTACCAGCA              | Quick change mutagenesis EsaB L21A                                                         |
| MGC134    | TGCTGGTACTGCTGCGTCATATGTGCC              | Quick change mutagenesis EsaB L21A                                                         |
| MGC9      | TATTTACCGATAGCAAACCTTAATAGCT             | Quick change mutagenesis EsaB K30A                                                         |
| MGC10     | AGCTATTAAGTTTGCTATCGGTAAATA              | Quick change mutagenesis EsaB K30A                                                         |
| MGC11     | AATACACAAATTGCAGTGATGACGAAA              | Quick change mutagenesis EsaB K52A                                                         |
| MGC12     | TTTCGTCATCACTGCAATTTGTGTATT              | Quick change mutagenesis EsaB K52A                                                         |
| MGC13     | AAAGTGATGACGGCAGGTCAATTACTT              | Quick change mutagenesis EsaB K56A                                                         |

|            |                             |                                    |
|------------|-----------------------------|------------------------------------|
| MGC14      | AAGTAATTGACCTGCCGTCATCACTTT | Quick change mutagenesis EsaB K56A |
| MGC15      | GAAAATGATCGAGCAATTGATTATCAA | Quick change mutagenesis EsaB L66A |
| MGC16      | TTGATAATCAATTGCTCGATCATTTTC | Quick change mutagenesis EsaB L66A |
| MGC135     | CAAATCGCTGATGCAGATATTTTGAAG | Quick change mutagenesis EsaB G74A |
| MGC136     | CTTCAAAATATCTGCATCAGCGATTTG | Quick change mutagenesis EsaB G74A |
| MGC17      | ATCGCTGATGGAGCAATTTTGAAGTTA | Quick change mutagenesis EsaB D75A |
| MGC18      | TAACTTCAAATGCTCCATCAGCGAT   | Quick change mutagenesis EsaB D75A |
| region-1-f | CAGGAGGTTTCTAGTTATGGC       | RT-PCR, region 1                   |
| region-1-r | GTTCTTGAACGGCATCAGC         | RT-PCR, region 1                   |
| region-2-f | GCATATGTACGCAAAGTAGGAC      | RT-PCR, region 2                   |
| region-2-r | TCGTTAGTTGCTCTTGAGTTC       | RT-PCR, region 2                   |

**Table S1.** Oligonucleotides used in this study. Restriction enzyme sites have been underlined.
